# Supplementary material for: The slan antigen identifies the prototypical non-classical CD16+-monocytes in human blood
Source: PubMed Central journal article supplement (PMC10641684; doi:10.3389/fimmu.2023.1287656), 2023-10-27
Supplement: Image_1.pdf [file Image_1.pdf]

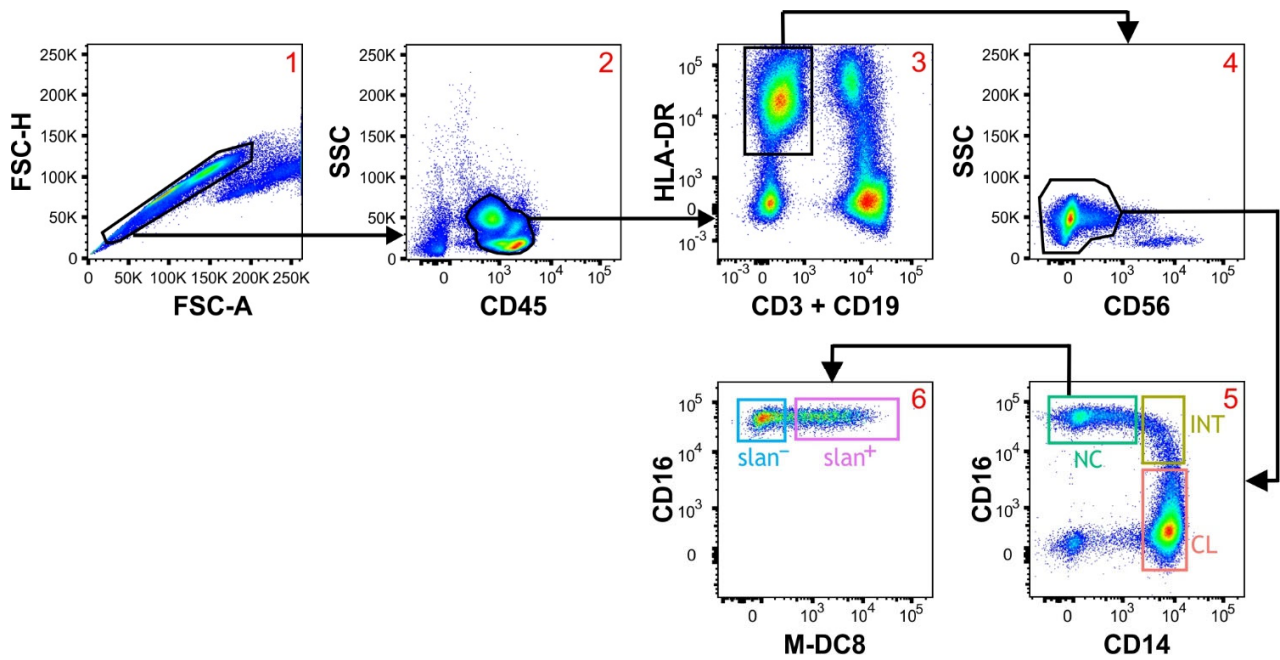

**Supplementary Figure 1. Flow cytometry gating strategy to sort blood monocyte subtypes.** CL-, INT-, total NC-, slan<sup>-</sup>/NC- and slan<sup>+</sup>/NC-monocytes were isolated by cell sorting from human PBMCs by the following gating strategy. At first, we excluded doublets (panel 1), then gated CD45<sup>+</sup>-cells (panel 2), then gated HLA-DR<sup>+</sup> lineage CD3/CD19-negative cells (panel 3) and, ultimately, we excluded CD56<sup>+</sup> NK cells (panel 4). Next, NC-, INT-, and CL-monocytes (respectively evidenced by the green, yellow ochre and salmon gates) were gated using CD14/CD16 markers (Panel 5). Finally, slan<sup>+</sup>/NC- (purple gate) and slan<sup>-</sup>/NC- (light blue gate) monocytes were separated within NC-monocytes by MDC8 staining, as shown in panel 6.
