# Supplementary material for: The slan antigen identifies the prototypical non-classical CD16+-monocytes in human blood
Source: PubMed Central journal article supplement (PMC10641684; doi:10.3389/fimmu.2023.1287656), 2023-10-27
Supplement: Image_2.pdf [file Image_2.pdf]

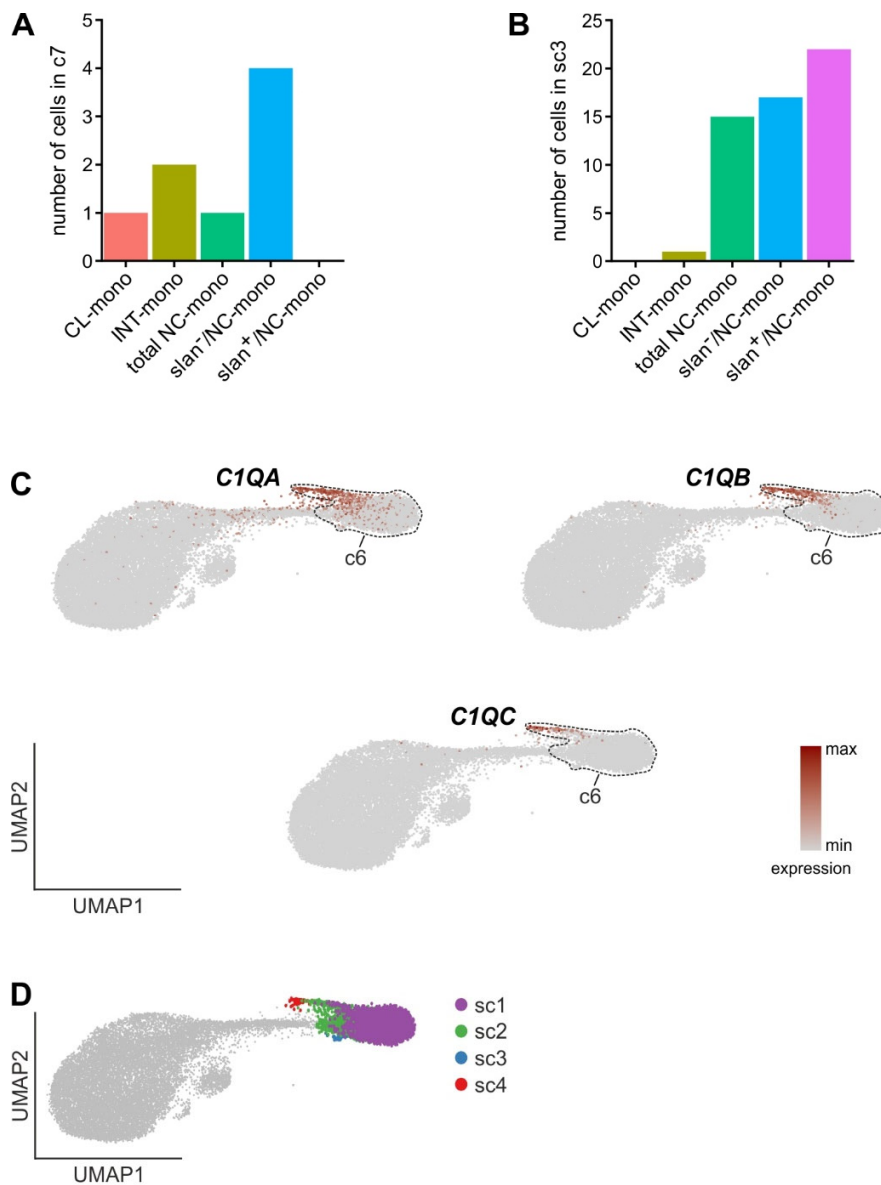

**Supplementary Figure 2. Identification of monocyte types in cells of c7, sc3 and among those expressing C1Q genes.** Bar graphs indicate the number of CL-, INT-, total NC-, slan<sup>-</sup>/NC- and slan<sup>+</sup>/NC-monocytes present in c7 from Figure 4C (panel A), and sc3 from Figure 6B (panel B). (C) Expression patterns of *C1QA*, *C1QB*, and *C1QC* mRNAs projected on the UMAP plot shown in Figure 4. The dotted lines encircle the cells included in c6 (displayed in Figure 4). (D) Projection of cells composing sc1-sc4, obtained by the sub-clustering of c6 (Figure 6), into the UMAP plot shown in Figure 4.
